# Supplementary material for: Randomised controlled trial of cognitive behavioural therapy in COPD
Source: PubMed Central journal article supplement — ERJ Open Res. 2018 Nov 23;4(4):00094-2018. doi: 10.1183/23120541.00094-2018 (PMC6250562; doi:10.1183/23120541.00094-2018), 2018-11-23
Supplement: 00094-2018_Supplementary_material.pdf [file 00094-2018_Supplementary_material.pdf]

**Supplementary Table S1 – Key components of the CBT Intervention**

|                                              | <b>Aim</b>                                                                                                                                                                                                                 |
|----------------------------------------------|----------------------------------------------------------------------------------------------------------------------------------------------------------------------------------------------------------------------------|
| Education<br>/increasing<br>awareness        | Increase awareness about COPD, anxiety and panic, role of adrenaline, and depression.<br><br>Help patients understand the link between physical and psychological symptoms.                                                |
| Bibliotherapy                                | Providing written materials for patients to work through independently (Northumberland, Tyne & Wear (NTW) Mental Health Trust Panic Leaflets; NTW Depression & Low Mood Leaflet; Self Help Toolkit).                       |
| Cognitive therapy                            | Identifying, challenging and reconsidering unhelpful thinking or behaviour and identifying more helpful ways of thinking/behaving.                                                                                         |
| Goal setting                                 | Agree goals important to the patient. Goals are reviewed, and modified to smaller or new goals if needed.                                                                                                                  |
| Graded tasks and<br>Behavioral<br>Activation | Reduce avoidance which commonly occurs with anxiety and depression.<br><br>Increase levels of activity, especially activities which provide a sense of achievement or pleasure, increase confidence and help improve mood. |

|                            |                                                                                                                                          |
|----------------------------|------------------------------------------------------------------------------------------------------------------------------------------|
| Breathing Control          | Instruction (written and verbal) and practice of breathing techniques that develop confidence in controlling breathing more effectively. |
| Relaxation/<br>mindfulness | Help the patient to learn to relax and cope with their physical symptoms.                                                                |
| Distraction                | To help use an alternative focus for attention to a patient's breathing to avoid triggers for panic.                                     |
| Comparing<br>outcomes      | Help patients identify and compare the advantages and disadvantages of their thinking or behavior.                                       |
| Biofeedback                | Providing feedback about physiological measurements as part of a behavioral change strategy.                                             |
| Re-attribution             | Identify perceived cause of an experience and identify alternative explanations e.g.                                                     |
| Positive self-talk         | Positive self- talk (aloud or silently) for encouragement or reassurance.                                                                |
| Problem solving            | Learning to analyze situations and identify strategies to overcome difficulties or any barriers.                                         |
| Graded exposure            | Replace avoidance with graded exposure to anxiety-provoking situations or activities.                                                    |
| Behavioral<br>Experiments  | Plan activities to test hypotheses about a particular belief or behavior and re-evaluate these.                                          |

**Supplementary table S2 – self-reported medication used by patients at baseline (n=279)**

| <b>Self-Report Respiratory Medication</b> | <b>CBT Group (n=139)- Number/ (percent)</b> | <b>Leaflet Group (n=140) Number / (percent)</b> | <b>Total (n=279) Number / (percent)</b> |
|-------------------------------------------|---------------------------------------------|-------------------------------------------------|-----------------------------------------|
| Short acting beta agonists                | 138 (99)                                    | 139 (99)                                        | 277 (99)                                |
| Short acting anticholinergics             | 1 (1)                                       | 2 (1)                                           | 3 (1)                                   |
| Long acting beta agonists                 | 2 (1)                                       | 1 (1)                                           | 3 (1)                                   |
| Long acting anticholinergics              | 128 (93)                                    | 132 (94)                                        | 187 (67)                                |
| Corticosteroids/Long acting beta agonists | 133 (96)                                    | 134 (96)                                        | 267 (96)                                |
| Mucolytics                                | 55 (40)                                     | 59 (42)                                         | 114 (41)                                |
| Nebulized short acting bronchodilators    | 18 (13)                                     | 21 (15)                                         | 39 (14)                                 |
| Diuretics                                 | 36 (26)                                     | 39 (28)                                         | 75 (27)                                 |
| Prepacks (steroids/antibiotics)           | 48 (35)                                     | 53 (38)                                         | 101 (36)                                |
| Oxygen ( short burst)                     | 4 (3)                                       | 2 (1)                                           | 6 (2)                                   |
| Oxygen (Long term oxygen therapy)         | 15 (11)                                     | 9 (6)                                           | 24 (9)                                  |
| Oxygen (Ambulatory oxygen)                | 2 (1)                                       | 4 (3)                                           | 6 (2)                                   |
| Anti-depressants                          | 52 (37)                                     | 47 (34)                                         | 99 (35)                                 |
| Anxiolytics                               | 14 (10)                                     | 6 (4)                                           | 20 (7)                                  |

**Supplementary Table S3 – Differences in mean HADS-Depression scores from baseline and between groups.**

|                                    | Mean improvement from baseline |               | Difference in mean improvement<br>(95% CI, p value) |
|------------------------------------|--------------------------------|---------------|-----------------------------------------------------|
|                                    | CBT Group                      | Leaflet Group |                                                     |
| HADS-Depression score at 3 months  | 2.20<br>n=115                  | 1.09<br>n=121 | 1.11<br>(0.19, 2.02, p=0.018)                       |
| HADS-Depression score at 6 months  | 2.35<br>n=101                  | 1.10<br>n=99  | 0.26<br>(0.25, 2.26, p=0.014)                       |
| HADS-Depression score at 12 months | 2.15<br>n=92                   | 1.35<br>n=79  | 0.80<br>(-0.28, 1.88, p=0.15)                       |

CBT- Cognitive behavioral therapy; CI-Confidence Interval; HADS- Hospital Anxiety & Depression Scale.

**Supplementary Table S4 – Average competency scores for CFARS rating scale.**

| <b>Competency</b>                                                    | <b>Average Score (scale 0-6)</b> |
|----------------------------------------------------------------------|----------------------------------|
| Focus/structure of session                                           | 5                                |
| Pacing                                                               | 4.4                              |
| Feedback/summaries                                                   | 4.5                              |
| Integration of CBT skills                                            | 4                                |
| Collaborative relationship                                           | 4.5                              |
| Guided discovery                                                     | 4.4                              |
| Interpersonal effectiveness                                          | 4.3                              |
| Elicit key components (physical symptoms/thoughts/feelings/behavior) | 4.4                              |
| Application of appropriate change techniques                         | 4.2                              |
| Closure of session                                                   | 4.3                              |
